# Supplementary material
Source: PubMed Central journal article supplement (PMC3094853)
Supplement: NIHMS254819-supplement-Supp_Data.pdf [file NIHMS254819-supplement-Supp_Data.pdf]

**CHEMBIOCHEM**

## Supporting Information

© Copyright Wiley-VCH Verlag GmbH & Co. KGaA, 69451 Weinheim, 2010

### **Unnatural Polyketide Analogues Selectively Target the HER Signaling Pathway in Human Breast Cancer Cells**

Seok Joon Kwon,<sup>[a]</sup> Moon Il Kim,<sup>[a]</sup> Bosung Ku,<sup>[a]</sup> Lydie Coulombel,<sup>[a]</sup> Jin-Hwan Kim,<sup>[b]</sup>  
Joseph H. Shawky,<sup>[a]</sup> Robert J. Linhardt,<sup>[b]</sup> and Jonathan S. Dordick<sup>\*[a]</sup>

cbic\_200900674\_sm\_miscellaneous\_information.pdf

# Supporting Information

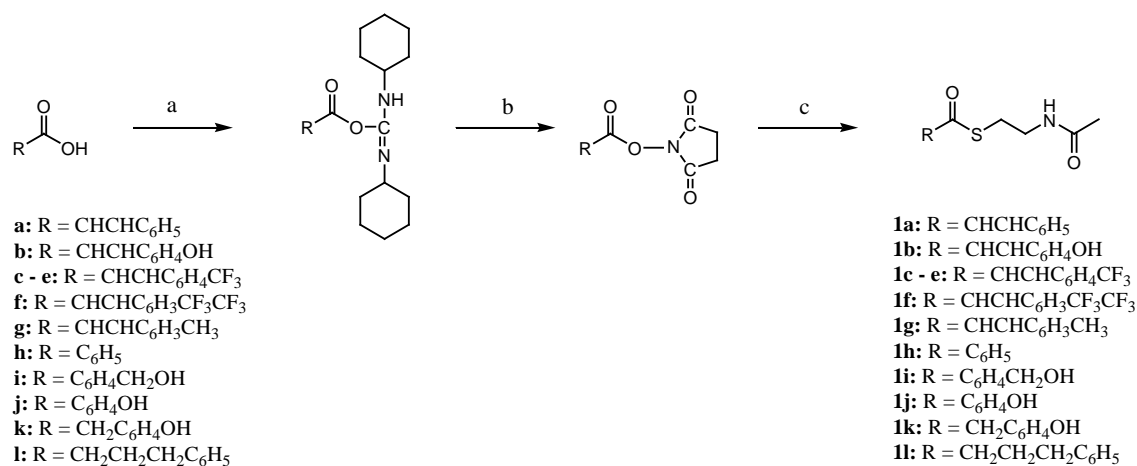

**Figure 1S.** Synthesis of N-acetylcysteamine thioester (SNAC) analogues (**1a – l**). Reagents: (a) DCC (dicyclohexyl carboimide), Ethyl acetate; (b) NHS (N-hydroxysuccinimide), Ethyl acetate; (c) NAC (N-acetylcysteamine), Ethyl acetate.

(a)

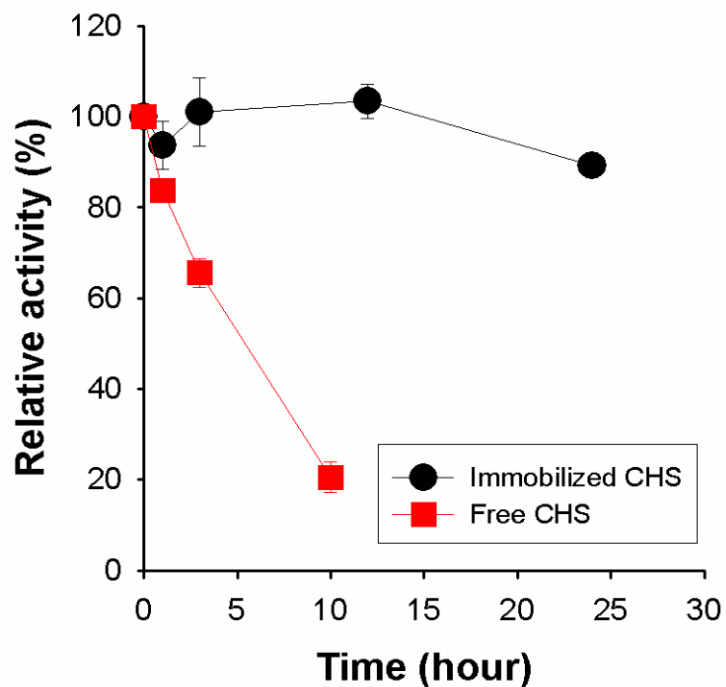

(b)

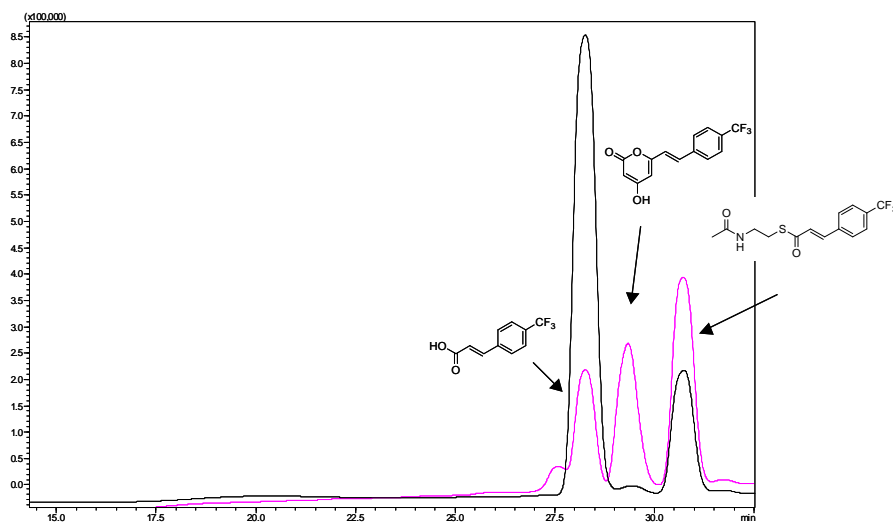

**Figure 2S.** (a) Stabilization of CHS via immobilization onto Ni-NTA agarose beads at room temperature under shaking at 150 rpm. (b) HPLC/MS analysis of 4-trifluoromethylcinnamoyl pyrone (2e) synthesized with free CHS (black line) and immobilized enzyme (pink line) Each peak was identified via LC/MS and NMR.

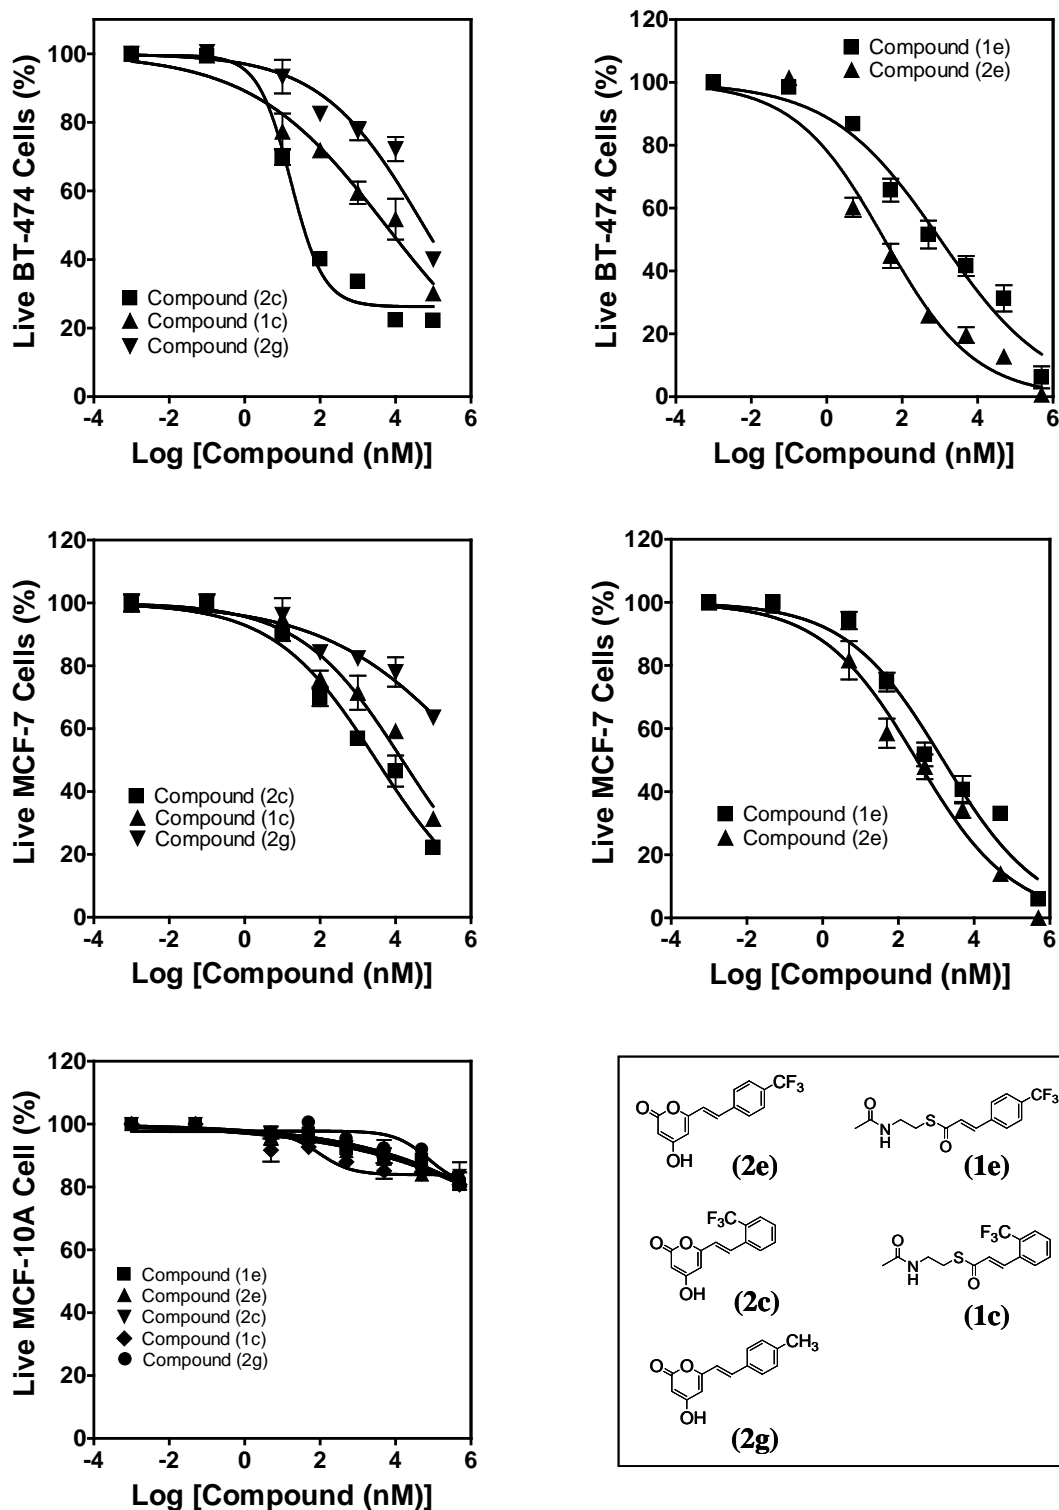

**Figure 3S.** Dose-response curves for cell growth inhibition on human non-transformed and tumor-derived cell lines by unnatural polyketides and their SNAc substrates.

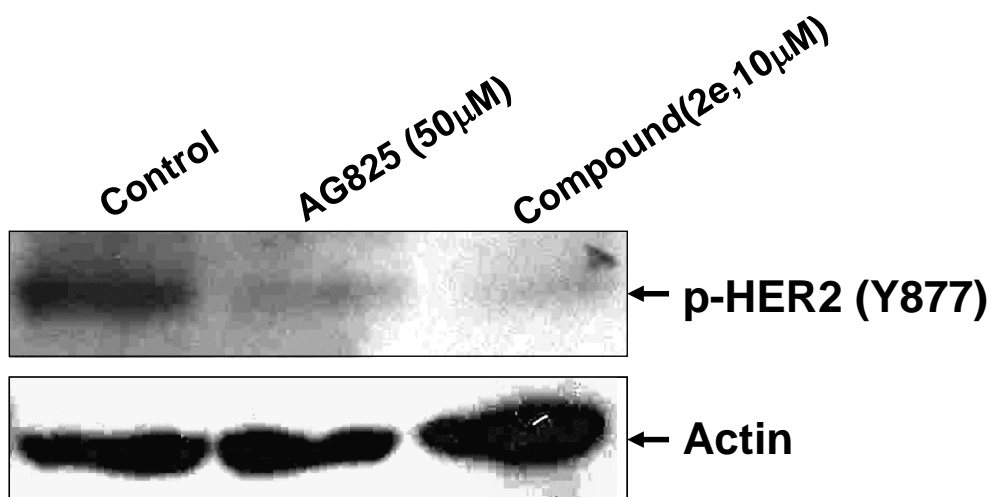

**Figure 4S.** Effect of 4-trifluoromethyl-cinnamoyl pyrone (**2e**) and AG825 on the phosphorylation of the kinase domain residue Tyr877 of HER2. Whole-cell lysates were subjected to SDS-PAGE analysis and probed with anti-phospho-HER2 (Tyr877) and anti-actin, respectively

## Compound characterization

**(E)-S-2-acetamidoethyl 3-phenylprop-2-enethioate (cinnamoyl-SNAC) (1a):**  $t_{Ret} = 34.6$  min, LC/MS : ESI(+)  $m/z$  250[M+H]<sup>+</sup>, 272[M+Na]<sup>+</sup>, 499[2M+H]<sup>+</sup>, 521[2M+Na]<sup>+</sup> ; ESI(+) MS/MS  $m/z$  131[M+H-CH<sub>3</sub>CONHC<sub>2</sub>H<sub>4</sub>SH]<sup>+</sup>. <sup>1</sup>H NMR (500 MHz, CD<sub>3</sub>OD):  $\delta = 1.9$  (s, 3H), 3.1 (t, 2H,  $J = 7$  Hz), 3.3 (t, 2H,  $J = 6.5$  Hz), 6.8 (d, 1H,  $J = 16$  Hz), 7.3 (m, 3H), 7.6 (m, 3H).

**(E)-S-2-acetamidoethyl 3-(4-hydroxyphenyl)prop-2-enethioate (coumaroyl-SNAC) (1b):**  $t_{Ret} = 26$  min, LC/MS : ESI(+)  $m/z$  266[M+H]<sup>+</sup>, 288[M+Na]<sup>+</sup>, 553[2M+Na]<sup>+</sup> ; ESI(-)  $m/z$  264[M-H]<sup>-</sup>, 551[2M-2H+Na]<sup>-</sup>. <sup>1</sup>H NMR (500 MHz, [CD<sub>3</sub>]DO):  $\delta = 1.9$  (s, 3H), 3.0 (t, 2H,  $J = 6.5$  Hz), 3.3 (t, 2H,  $J = 7$  Hz), 6.6 (d, 1H,  $J = 16$  Hz), 6.7 (dd, 2H,  $J = 6.5$ , 2 Hz), 7.4 (dd, 2H,  $J = 7$ , 2 Hz), 7.5 (d, 1H,  $J = 15.5$ ).

**(E)-S-2-acetamidoethyl 3-(2-(trifluoromethyl)phenyl)prop-2-enethioate (1c):**  $t_{Ret} = 37.2$  min, LC/MS : ESI(+)  $m/z$  318[M+H]<sup>+</sup>, 340[M+Na]<sup>+</sup> ; ESI(-)  $m/z$  316[M-H]<sup>-</sup>, 352[M+Cl-H]<sup>-</sup>, 362[M+OOCH-H]<sup>-</sup>; ESI(+) MS/MS  $m/z$  199[M+H-CH<sub>3</sub>CONHC<sub>2</sub>H<sub>4</sub>SH]<sup>+</sup>. <sup>1</sup>H NMR (500 MHz, CD<sub>3</sub>OD)  $\delta$  [ppm]: 1.9 (3H, s), 3.1 (2H, t,  $J = 7$  Hz), 3.3 (2H, t,  $J = 7$  Hz), 6.7 (1H, d,  $J = 15.5$ ), 7.47 (1H, m), 7.56 (1H, m), 7.65 (1H, d,  $J = 7.5$  Hz), 7.8 (1H, d,  $J = 7.5$  Hz), 7.84 (1H, m), 7.87 (1H, m). <sup>13</sup>C NMR (500 MHz)  $\delta$  [ppm]: 23.4, 30.2, 40.9, 125.2, 127.3, 128.0, 130.0, 130.7, 132.2, 134.5, 134.6, 137.4, 174.2, 191.2.

**(E)-S-2-acetamidoethyl 3-(3-(trifluoromethyl)phenyl)prop-2-enethioate (1d):**  $t_{Ret} = 37.7$  min, LC/MS : ESI(+)  $m/z$  318[M+H]<sup>+</sup>, 340[M+Na]<sup>+</sup> ; ESI(-)  $m/z$  316[M-H]<sup>-</sup>, 352[M+Cl-H]<sup>-</sup>, 362[M+OOCH-H]<sup>-</sup>; ESI(+) MS/MS  $m/z$  199[M+H-CH<sub>3</sub>CONHC<sub>2</sub>H<sub>4</sub>SH]<sup>+</sup>.

**(E)-S-2-acetamidoethyl 3-(4-(trifluoromethyl)phenyl)prop-2-enethioate (1e) :**  $t_{Ret} = 38$  min, LC/MS : ESI(+)  $m/z$  318[M+H]<sup>+</sup>, 340[M+Na]<sup>+</sup> ; ESI(-)  $m/z$  316[M-H]<sup>-</sup>,

352[M+Cl-H]<sup>-</sup>, 362[M+OOCH-H]<sup>-</sup>; ESI(+) MS/MS *m/z* 199[M+H-CH<sub>3</sub>CONHC<sub>2</sub>H<sub>4</sub>SH]<sup>+</sup>. <sup>1</sup>H NMR (500 MHz, CDCl<sub>3</sub>) δ [ppm]: 1.9 (3H, s), 3.1 (2H, t, *J* = 6.4 Hz), 3.5 (2H, dd, *J* = 12.5 Hz, *J* = 6.1 Hz), 6.7 (1H, d, *J* = 15.9), 7.63 (1H, d, *J* = 15.9), 7.64-7.68 (4H, m).

**(E)-S-2-acetamidoethyl 3-(3,5-bis(trifluoromethyl)phenyl)prop-2-enethioate (1f):** *t*<sub>Ret</sub> = 39 min, LC/MS : ESI(+) *m/z* 386[M+H]<sup>+</sup>, 408[M+Na]<sup>+</sup> ; ESI(-) *m/z* 384[M-H]<sup>-</sup>.

**(E)-S-2-acetamidoethyl 3-p-tolylprop-2-enethioate (1g):** *t*<sub>Ret</sub> = 36 min, LC/MS : ESI(+) *m/z* 264[M+H]<sup>+</sup>, 286[M+Na]<sup>+</sup> ; ESI(-) *m/z* 262 [M-H]<sup>-</sup>.

**S-2-acetamidoethyl benzothioate (1h):** *t*<sub>Ret</sub> = 29 min, LC/MS : ESI(+) *m/z* 224[M+H]<sup>+</sup>, 246[M+Na]<sup>+</sup>, 469[2M+Na]<sup>+</sup>. <sup>1</sup>H NMR (500 MHz, CD<sub>3</sub>OD): δ= 1.93 (s, 3H), 3.1 (t, 2H, *J*=7 Hz), 3.4 (t, 2H, *J*=7 Hz), 7.4 (m, 2H), 7.5 (m, 1H), 7.9 (m, 2H).

**S-2-acetamidoethyl 4-(hydroxymethyl)benzothioate (1i):** *t*<sub>Ret</sub> = 20 min, LC/MS : ESI(+) *m/z* 254[M+H]<sup>+</sup>, 276[M+Na]<sup>+</sup>, 529[2M+Na]<sup>+</sup>. <sup>1</sup>H NMR (500 MHz, [CD<sub>3</sub>]DO): δ= 2.2 (s, 3H), 2.9 (t, 2H, *J*=6.5 Hz), 3.1 (t, 2H, *J*=6.5 Hz), 3.3 (t, 2H, *J*=6 Hz), 7.4 (m, 2H), 7.9 (m, 2H).

**S-2-acetamidoethyl 4-hydroxybenzothioate (1j):** *t*<sub>Ret</sub> = 21 min, LC/MS : ESI(+) *m/z* 239[M+H]<sup>+</sup>, 262[M+Na]<sup>+</sup>, 501[2M+Na]<sup>+</sup> ; ESI(-) *m/z* 238[M-H]<sup>-</sup>. <sup>1</sup>H NMR (500 MHz, CD<sub>3</sub>OD): δ= 1.9 (s, 3H), 3.1 (t, 2H, *J*=7 Hz), 3.3 (t, 2H, *J*=6.5 Hz), 6.8 (d, 2H, *J*=9.5), 7.8 (d, 2H, *J*=9).

**S-2-acetamidoethyl 2-(4-hydroxyphenyl)ethanethioate (1k):** *t*<sub>Ret</sub> = 22 min, LC/MS : ESI(+) *m/z* 254[M+H]<sup>+</sup>, 276[M+Na]<sup>+</sup>, 529[2M+Na]<sup>+</sup> ; ESI(-) *m/z* 252[M-H]<sup>-</sup>. <sup>1</sup>H NMR (500 MHz, CD<sub>3</sub>DO): δ= 1.9 (s, 3H), 2.9 (t, 2H, *J*=7 Hz), 3.2 (t, 2H, *J*=7 Hz), 3.7 (s, 2H), 6.7 (dd, 2H, *J*=6.5, 2 Hz), 7.0 (dd, 2H, *J*=6.5, 2 Hz).

**S-2-acetamidoethyl 4-phenylbutanethioate (1l):** *t*<sub>Ret</sub> = 35 min, LC/MS : ESI(+) *m/z* 266[M+H]<sup>+</sup>, 288[M+Na]<sup>+</sup>, 553[2M+Na]<sup>+</sup>. <sup>1</sup>H NMR (500 MHz, [CD<sub>3</sub>]DO): δ= 1.8 (s,

3H), 1.86-1.92 (m, 2H), 2.51 (t, 2H, J=8 Hz). 2.57 (t, 2H, J=8 Hz), 2.9 (t, 2H, J=7 Hz), 3.2 (t, 2H, J=7 Hz), 7.1 (m, 3H), 7.2 (m, 2H)

**4-Hydroxy-6-styryl-pyran-2-one (2a):**  $t_{Ret} = 36$  min, Yield = 12%; LC/MS : ESI(+)  $m/z$  215[M+H]<sup>+</sup>; ESI(-)  $m/z$  213[M-H]<sup>-</sup>; ESI(-) MS/MS  $m/z$  169[M-H-CO<sub>2</sub>]<sup>-</sup>. <sup>1</sup>H NMR (500 MHz, [CD<sub>3</sub>]DO):  $\delta = 5.4$  (s, 1H), 6.0 (s, 1H), 6.7 (d, 1H, J=16 Hz), 7.2 (m, 2H), 7.3 (t, 2H, J=7.5 Hz), 7.5 (d, 2H, J=7.5 Hz).

**4-Hydroxy-6-[2-(2-trifluoromethyl-phenyl)-vinyl]-pyran-2-one (2c):**  $t_{Ret} = 37.3$  min, LC/MS : ESI(+)  $m/z$  283[M+H]<sup>+</sup>; ESI(-)  $m/z$  281[M-H]<sup>-</sup>; ESI(-) MS/MS  $m/z$  237[M-H-CO<sub>2</sub>]<sup>-</sup>. <sup>1</sup>H NMR (500 MHz, CD<sub>3</sub>OD)  $\delta$  [ppm]: 5.5 (1H, s), 6.2 (1H, s), 6.9 (1H, d, J = 16 Hz), 7.5 (1H, t, J = 8), 7.6 (1H, t, J = 7.5), 7.7 (2H, m), 7.9 (1H, d, J = 8 Hz). <sup>13</sup>C NMR (500 MHz, CD<sub>3</sub>OD)  $\delta$  [ppm]: 105.9, 125.4, 127.9, 129.5, 130.9, 131.9, 134.4, 136.3, 160.9, 167.9, 174.1.

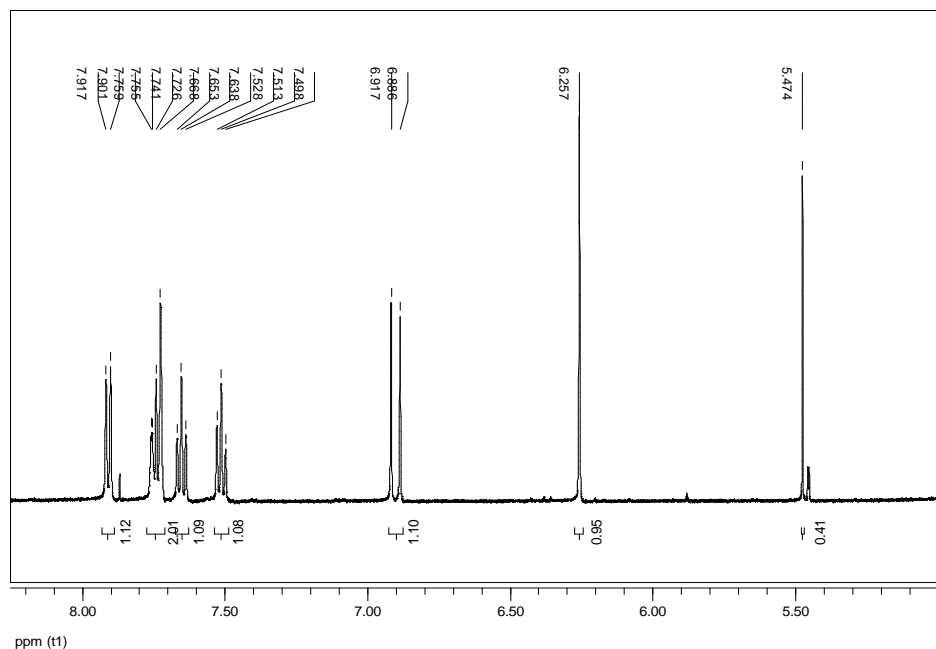

**Figure 5S.** <sup>1</sup>H NMR of 4-Hydroxy-6-[2-(2-trifluoromethyl-phenyl)-vinyl]-pyran-2-one (2c)





(1H, d,  $J = 16$  Hz), 7.47 (2H, d,  $J = 8$  Hz) (Figure 5S).  $^{13}\text{C}$  NMR (500 MHz,  $\text{CD}_3\text{OD}$ )  $\delta$  [ppm]: 22, 91, 103, 119, 129.3, 131.3, 134.6, 137.5, 141.7, 162, 168, 173.

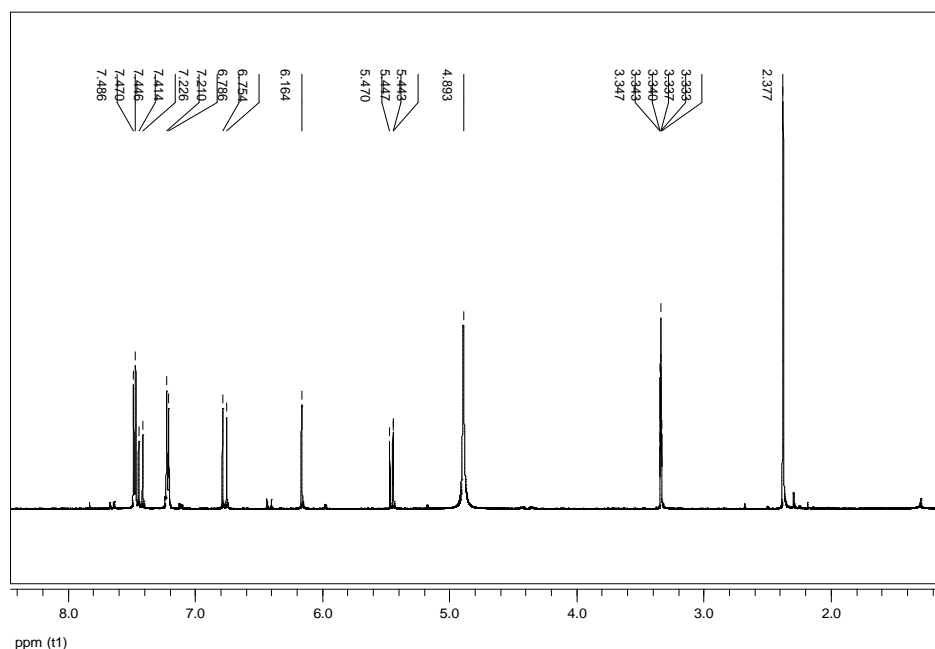

**Figure 7S.**  $^1\text{H}$  NMR of 4-Hydroxy-6-[2-(4-methyl-phenyl)-vinyl]-pyran-2-one (**2g**)

**4-hydroxy-6-phenyl-2H-pyran-2-one (2h):** Yield = 7.7%; LC/MS : ESI(+)  $m/z$  189[M+H] $^+$ ; ESI(-)  $m/z$  187[M-H] $^-$ .  $^1\text{H}$  NMR (500 MHz,  $[\text{CD}_3]\text{DO}$ ):  $\delta$ = 1.8 (s, 3H), 1.86-1.92 (m, 2H), 2.51 (t, 2H,  $J=8$  Hz). 2.57 (t, 2H,  $J=8$  Hz), 2.9 (t, 2H,  $J=7$  Hz), 3.2 (t, 2H,  $J=7$  Hz), 7.1 (m, 3H), 7.2 (m, 2H).

**4-Hydroxy-6-(3-phenyl-propyl)-pyran-2-one (2l) :**  $t_{\text{Ret}} = 35.3$  min, Yield = 6%; LC/MS : ESI(+)  $m/z$  231[M+H] $^+$ ; ESI(-)  $m/z$  229[M-H] $^-$ . 4-Hydroxy-6-(2-oxo-4-phenyl-but-3-enyl)-pyran-2-one (**3a**) :  $t_{\text{Ret}} = 35$  min, LC/MS : ESI(+)  $m/z$  257[M+H] $^+$ ; ESI(-)  $m/z$  255[M-H] $^-$ .  $^1\text{H}$  NMR (500 MHz,  $[\text{CD}_3]\text{DO}$ ):  $\delta$ = 3.3 (m, 2H), 5.6 (s, 1H), 6.0 (s, 1H), 6.7 (d, 1H,  $J=16$  Hz), 7.2 (m, 2H), 7.3 (t, 2H,  $J=8$  Hz), 7.5 (d, 2H,  $J=7.5$  Hz).

**4-Hydroxy-6-[4-(4-hydroxy-phenyl)-2-oxo-but-3-enyl]-pyran-2-one (3b):**  $t_{\text{Ret}} = 16$  min, LC/MS : ESI(+)  $m/z$  273[M+H] $^+$ ; ESI(-)  $m/z$  271[M-H] $^-$ ; ESI(-) MS/MS  $m/z$  227 [M-H-CO $_2$ ] $^-$ .

**4-Hydroxy-6-[2-oxo-4-(2-trifluoromethyl-phenyl)-but-3-enyl]-pyran-2-one (3c):**  $t_{\text{Ret}} = 36.1$  min, LC/MS : ESI(+)  $m/z$  325[M+H]<sup>+</sup>, 347[M+Na]<sup>+</sup>; ESI(-)  $m/z$  323[M-H]<sup>-</sup>, 346[M+Na]<sup>-</sup>; ESI(-) MS/MS  $m/z$  279 [M-H-CO<sub>2</sub>]<sup>-</sup>.

**4-Hydroxy-6-[2-oxo-4-(3-trifluoromethyl-phenyl)-but-3-enyl]-pyran-2-one (3d):**  $t_{\text{Ret}} = 36.1$  min, LC/MS : ESI(+)  $m/z$  325[M+H]<sup>+</sup>, 347[M+Na]<sup>+</sup>; ESI(-)  $m/z$  323[M-H]<sup>-</sup>, 346[M+Na]<sup>-</sup>; ESI(-) MS/MS  $m/z$  279 [M-H-CO<sub>2</sub>]<sup>-</sup>.

**4-Hydroxy-6-[2-oxo-4-(4-trifluoromethyl-phenyl)-but-3-enyl]-pyran-2-one (3e):**  $t_{\text{Ret}} = 36.1$  min, LC/MS : ESI(+)  $m/z$  325[M+H]<sup>+</sup>, 347[M+Na]<sup>+</sup>; ESI(-)  $m/z$  323[M-H]<sup>-</sup>, 346[M+Na]<sup>-</sup>; ESI(-) MS/MS  $m/z$  279 [M-H-CO<sub>2</sub>]<sup>-</sup>.

**4-Hydroxy-6-(2-oxo-2-phenyl-ethyl)-pyran-2-one (3h):**  $t_{\text{Ret}} = 35$  min, Yield = 21%; LC/MS : ESI(+)  $m/z$  231[M+H]<sup>+</sup>, 253[M+Na]<sup>+</sup>, 483[2M+Na]<sup>+</sup>; ESI(-)  $m/z$  229[M-H]<sup>-</sup>. <sup>1</sup>H NMR (500 MHz, CD<sub>3</sub>OD)  $\delta$  [ppm]: 3.4 (2H, t,  $J = 7$  Hz), 5.4 (1H, s), 6.0 (1H, s), 7.4 (3H, m), 7.9 (2H, m).

**4-Hydroxy-6-[2-(4-hydroxymethyl-phenyl)-2-oxo-ethyl]-pyran-2-one (3i):**  $t_{\text{Ret}} = 32$  min, LC/MS : ESI(+)  $m/z$  261[M+H]<sup>+</sup>; ESI(-)  $m/z$  259[M-H]<sup>-</sup>.

**4-Hydroxy-6-[2-(4-hydroxy-phenyl)-2-oxo-ethyl]-pyran-2-one (3j):**  $t_{\text{Ret}} = 36$  min, Yield = 15.7%; LC/MS : ESI(+)  $m/z$  247[M+H]<sup>+</sup>; ESI(-)  $m/z$  245[M-H]<sup>-</sup>. <sup>1</sup>H NMR (500 MHz, [CD<sub>3</sub>]DO):  $\delta = 3.7$  (m, 2H), 5.5 (m, 2H), 6.8 (m, 2H), 7.8 (m, 2H).

**4-Hydroxy-6-(2-oxo-5-phenyl-pentyl)-pyran-2-one (3l):**  $t_{\text{Ret}} = 34.5$  min, LC/MS : ESI(+)  $m/z$  273[M+H]<sup>+</sup>; ESI(-)  $m/z$  271[M-H]<sup>-</sup>.

**5,7-dihydroxy-2-(4-hydroxyphenyl)chroman-4-one (4b):**  $t_{\text{Ret}} = 31$  min, Yield = 4.5%; LC/MS : ESI(+)  $m/z$  273[M+H]<sup>+</sup>; ESI(-)  $m/z$  271[M-H]<sup>-</sup>. <sup>1</sup>H NMR (500 MHz, [CD<sub>3</sub>]DO):  $\delta = 2.7$  (dd, 1H,  $J = 3, 17$  Hz), 3.1 (dd, 1H,  $J = 13, 17.5$  Hz), 5.3 (dd, 1H,  $J = 3, 13$  Hz), 5.8 (m, 2H), 6.8 (d, 2H,  $J = 8.5$  Hz), 7.3 (d, 2H,  $J = 9$  Hz)

**4-Hydroxy-3,5-dimethyl-6-styryl-pyran-2-one (5a):**  $t_{Ret} = 37$  min, LC/MS : ESI(+)  $m/z$  243[M+H]<sup>+</sup>; ESI(-)  $m/z$  241[M-H]<sup>-</sup>; ESI(-) MS/MS  $m/z$  182[M-H-CO<sub>2</sub>-CH<sub>3</sub>]<sup>-</sup>, 197[M-H-CO<sub>2</sub>]<sup>-</sup>.

**4-Hydroxy-3,5-dimethyl-6-[2-(2-trifluoromethyl-phenyl)-vinyl]-pyran-2-one (5c):**  $t_{Ret} = 38.9$  min, LC/MS : ESI(+)  $m/z$  311[M+H]<sup>+</sup>; ESI(-)  $m/z$  309[M-H]<sup>-</sup>; ESI(-) MS/MS  $m/z$  250[M-H-CO<sub>2</sub>-CH<sub>3</sub>]<sup>-</sup>, 265[M-H-CO<sub>2</sub>]<sup>-</sup>.

**4-Hydroxy-3,5-dimethyl-6-[2-(3-trifluoromethyl-phenyl)-vinyl]-pyran-2-one (5d):**  $t_{Ret} = 38.9$  min, LC/MS : ESI(+)  $m/z$  311[M+H]<sup>+</sup>; ESI(-)  $m/z$  309[M-H]<sup>-</sup>; ESI(-) MS/MS  $m/z$  250[M-H-CO<sub>2</sub>-CH<sub>3</sub>]<sup>-</sup>, 265[M-H-CO<sub>2</sub>]<sup>-</sup>.

**4-Hydroxy-3,5-dimethyl-6-[2-(4-trifluoromethyl-phenyl)-vinyl]-pyran-2-one (5e):**  $t_{Ret} = 38.9$  min, LC/MS : ESI(+)  $m/z$  311[M+H]<sup>+</sup>; ESI(-)  $m/z$  309[M-H]<sup>-</sup>; ESI(-) MS/MS  $m/z$  250[M-H-CO<sub>2</sub>-CH<sub>3</sub>]<sup>-</sup>, 265[M-H-CO<sub>2</sub>]<sup>-</sup>.

**4-Hydroxy-3,5-dimethyl-6-phenyl-pyran-2-one (5h):**  $t_{Ret} = 40$  min, LC/MS : ESI(+)  $m/z$  217[M+H]<sup>+</sup>, 239[M+Na]<sup>+</sup>; ESI(-)  $m/z$  215[M-H]<sup>-</sup>.

**4-Hydroxy-3,5-dimethyl-6-(3-phenyl-propyl)-pyran-2-one (5l):**  $t_{Ret} = 37$  min, LC/MS : ESI(+)  $m/z$  259[M+H]<sup>+</sup>; ESI(-)  $m/z$  257[M-H]<sup>-</sup>.

**4-Hydroxy-3,5-dimethyl-6-(1-methyl-2-oxo-4-phenyl-but-3-enyl)-pyran-2-one (6a):**  $t_{Ret} = 31$  min, LC/MS : ESI(+)  $m/z$  299[M+H]<sup>+</sup>; ESI(-)  $m/z$  297[M-H]<sup>-</sup>; ESI(-) MS/MS  $m/z$  119[M-H-CO<sub>2</sub>-HOC<sub>6</sub>H<sub>4</sub>CHCO]<sup>-</sup>, 176[M-H-HOC<sub>6</sub>H<sub>4</sub>CO]<sup>-</sup>, 253[M-H-CO<sub>2</sub>]<sup>-</sup>.

**4-Hydroxy-6-[4-(4hydroxy-phenyl)-1-methyl-2-oxo-but-3-enyl]-3,5-dimethyl-pyran-2-one (6b):**  $t_{Ret} = 28$  min, LC/MS : ESI(+)  $m/z$  315[M+H]<sup>+</sup>; ESI(-)  $m/z$  313[M-H]<sup>-</sup>.

**6-[4-(3,5-Bis-trifluoromethyl-phenyl)-1-methyl-2-oxo-but-3-enyl]-4-hydroxy-3,5-dimethyl-pyran-2-one (6f):**  $t_{\text{Ret}} = 35$  min, LC/MS : ESI(+)  $m/z$  435[M+H]<sup>+</sup>; ESI(-)  $m/z$  433[M-H]<sup>-</sup>.

**4-Hydroxy-6-[3-(4-hydroxy-phenyl)-1-methyl-2-oxo-propyl]-3,5-dimethyl-pyran-2-one (6k):**  $t_{\text{Ret}} = 24$  min, LC/MS : ESI(+)  $m/z$  325[M+Na]<sup>+</sup>; ESI(-)  $m/z$  301[M-H]<sup>-</sup>; ESI(-) MS/MS  $m/z$  123[M-H-CO<sub>2</sub>-HOC<sub>6</sub>H<sub>4</sub>CHCO]<sup>-</sup>, 167[M-H-HOC<sub>6</sub>H<sub>4</sub>CO]<sup>-</sup>, 257[M-H-CO<sub>2</sub>]<sup>-</sup>.
